# Supplementary material for: Teaching high school students to use online consumer health resources on mobile phones: outcome of a pilot project in Oyo State, Nigeria
Source: PubMed Central journal article supplement (PMC6466491; doi:10.5195/jmla.2019.536), 2019-04-01

## Teaching high school students to use online consumer health resources on mobile phones: outcome of a pilot project in Oyo State, Nigeria

Grace Ada Ajuwon; Ademola Johnson Ajuwon

### APPENDIX A

#### Leaflet

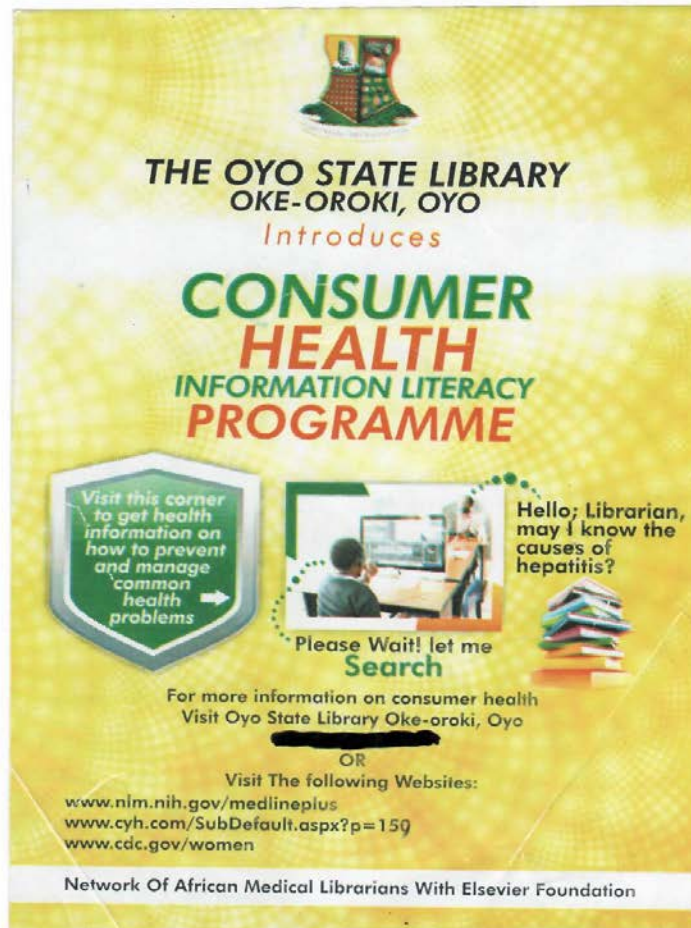

Supplement: jmla-107-194-s001.pdf [file jmla-107-194-s001.pdf]
