# Supplementary material for: Teaching high school students to use online consumer health resources on mobile phones: outcome of a pilot project in Oyo State, Nigeria
Source: PubMed Central journal article supplement (PMC6466491; doi:10.5195/jmla.2019.536), 2019-04-01
Supplement: jmla-107-194-s002.pdf [file jmla-107-194-s002.pdf]

## Teaching high school students to use online consumer health resources on mobile phones: outcome of a pilot project in Oyo State, Nigeria

Grace Ada Ajuwon; Ademola Johnson Ajuwon

### APPENDIX B

#### Consumer health information literacy project pre-post test questionnaire

##### A. Demographic profiles of students

1. Telephone number: \_\_\_\_\_
2. Name of school: \_\_\_\_\_
3. Age: \_\_\_\_\_ years      4. Gender:      1. Male      2. Female
5. Class:      1. SS1      2. SS2      6. Date: \_\_\_\_\_
6. Religion:      1. Christianity      2. Islam      3. Other \_\_\_\_\_ (specify)

##### B. Knowledge of online health information

1. Have you ever used your phone to browse the Internet      1. Yes      2. No
2. Have you ever heard of consumer health information?      1. Yes      2. No
3. List all sources of information on health that you know
  - a. \_\_\_\_\_
  - b. \_\_\_\_\_
  - c. \_\_\_\_\_
  - d. \_\_\_\_\_
4. List websites where students can get health information from the Internet
  - a. \_\_\_\_\_
  - b. \_\_\_\_\_
  - c. \_\_\_\_\_
  - d. \_\_\_\_\_
5. Which site did you visit on the Internet for health information?
  1. Yahoo      2. Google      3. Facebook      4. TeensHealth
6. Define who a peer educator is \_\_\_\_\_
7. List characteristics of a good peer educator \_\_\_\_\_
