# Supplementary material for: Teaching high school students to use online consumer health resources on mobile phones: outcome of a pilot project in Oyo State, Nigeria
Source: PubMed Central journal article supplement (PMC6466491; doi:10.5195/jmla.2019.536), 2019-04-01
Supplement: jmla-107-194-s003.pdf [file jmla-107-194-s003.pdf]

**Teaching high school students to use online consumer health resources on mobile phones: outcome of a pilot project in Oyo State, Nigeria**

Grace Ada Ajuwon; Ademola Johnson Ajuwon

**APPENDIX C**

**Peer education activity form**

Consumer health information (CHI) literacy project records of activities of peer educators (PE)

Name of PE: \_\_\_\_\_ Sex of PE \_\_\_\_\_

Name of school: \_\_\_\_\_

| Date | Type of activity |                               |              |          |                  |
|------|------------------|-------------------------------|--------------|----------|------------------|
|      | Show website     | Provide information about CHI | Give leaflet | Referral | Others (specify) |
|      |                  |                               |              |          |                  |
|      |                  |                               |              |          |                  |
|      |                  |                               |              |          |                  |
|      |                  |                               |              |          |                  |
|      |                  |                               |              |          |                  |
|      |                  |                               |              |          |                  |
|      |                  |                               |              |          |                  |
|      |                  |                               |              |          |                  |
|      |                  |                               |              |          |                  |
|      |                  |                               |              |          |                  |
|      |                  |                               |              |          |                  |
|      |                  |                               |              |          |                  |
|      |                  |                               |              |          |                  |
|      |                  |                               |              |          |                  |
|      |                  |                               |              |          |                  |
|      |                  |                               |              |          |                  |
|      |                  |                               |              |          |                  |
|      |                  |                               |              |          |                  |
|      |                  |                               |              |          |                  |
|      |                  |                               |              |          |                  |
|      |                  |                               |              |          |                  |
